# Supplementary material for: Epitranscriptomic editing of the RNA N6-methyladenosine modification by dCasRx conjugated methyltransferase and demethylase
Source: PubMed Central journal article supplement — Nucleic Acids Res. 2021 Jun 28;49(13):7361–74. doi: 10.1093/nar/gkab517 (PMC8287920; doi:10.1093/nar/gkab517), 2021-06-28
Supplement: gkab517_supplemental_file.pdf [file gkab517_supplemental_file.pdf]

**Supplementary data for**

**Epitranscriptomic editing of the RNA N6-methyladenosine modification  
by dCasRx conjugated methyltransferase and demethylase**

**Xia et al.**



**Figure S1. dCasRx epitranscriptomic editors editing window on *ACTB* and *FOXM1* mRNA.**

**a**, Schematic diagram of sgRNA designed for dCasRx epitranscriptomic editors. **b, e**, Illustration of the sgRNAs designed for targeting *ACTB* A1216 (**b**), *FOXM1* A3488 (**e**). Each 30-nt sgRNAs (purple) ending (-1, -4, -7, -10) or starting (+1, +4, +7, +10) at the indicated bp from the targeted site, and 0-nt sgRNA represented the sgRNA covered on targeted site. **c, f**, Normalized abundance of m6A altered by dCasRx-METTTL3 with sgRNAs targeting *ACTB* A1216 (**c**), *FOXM1* A3488 (**f**). **d, g**, Normalized abundance of m6A altered by dCasRx-ALKBH5 with sgRNAs targeting *ACTB* A1216 (**d**), *FOXM1* A3488 (**g**). Data is represented as mean  $\pm$  SEM. (ANOVA; \*, P value < 0.05; \*\*, P value < 0.01; \*\*\*, P value < 0.001; n = 3).

## Supplementary Figure S2

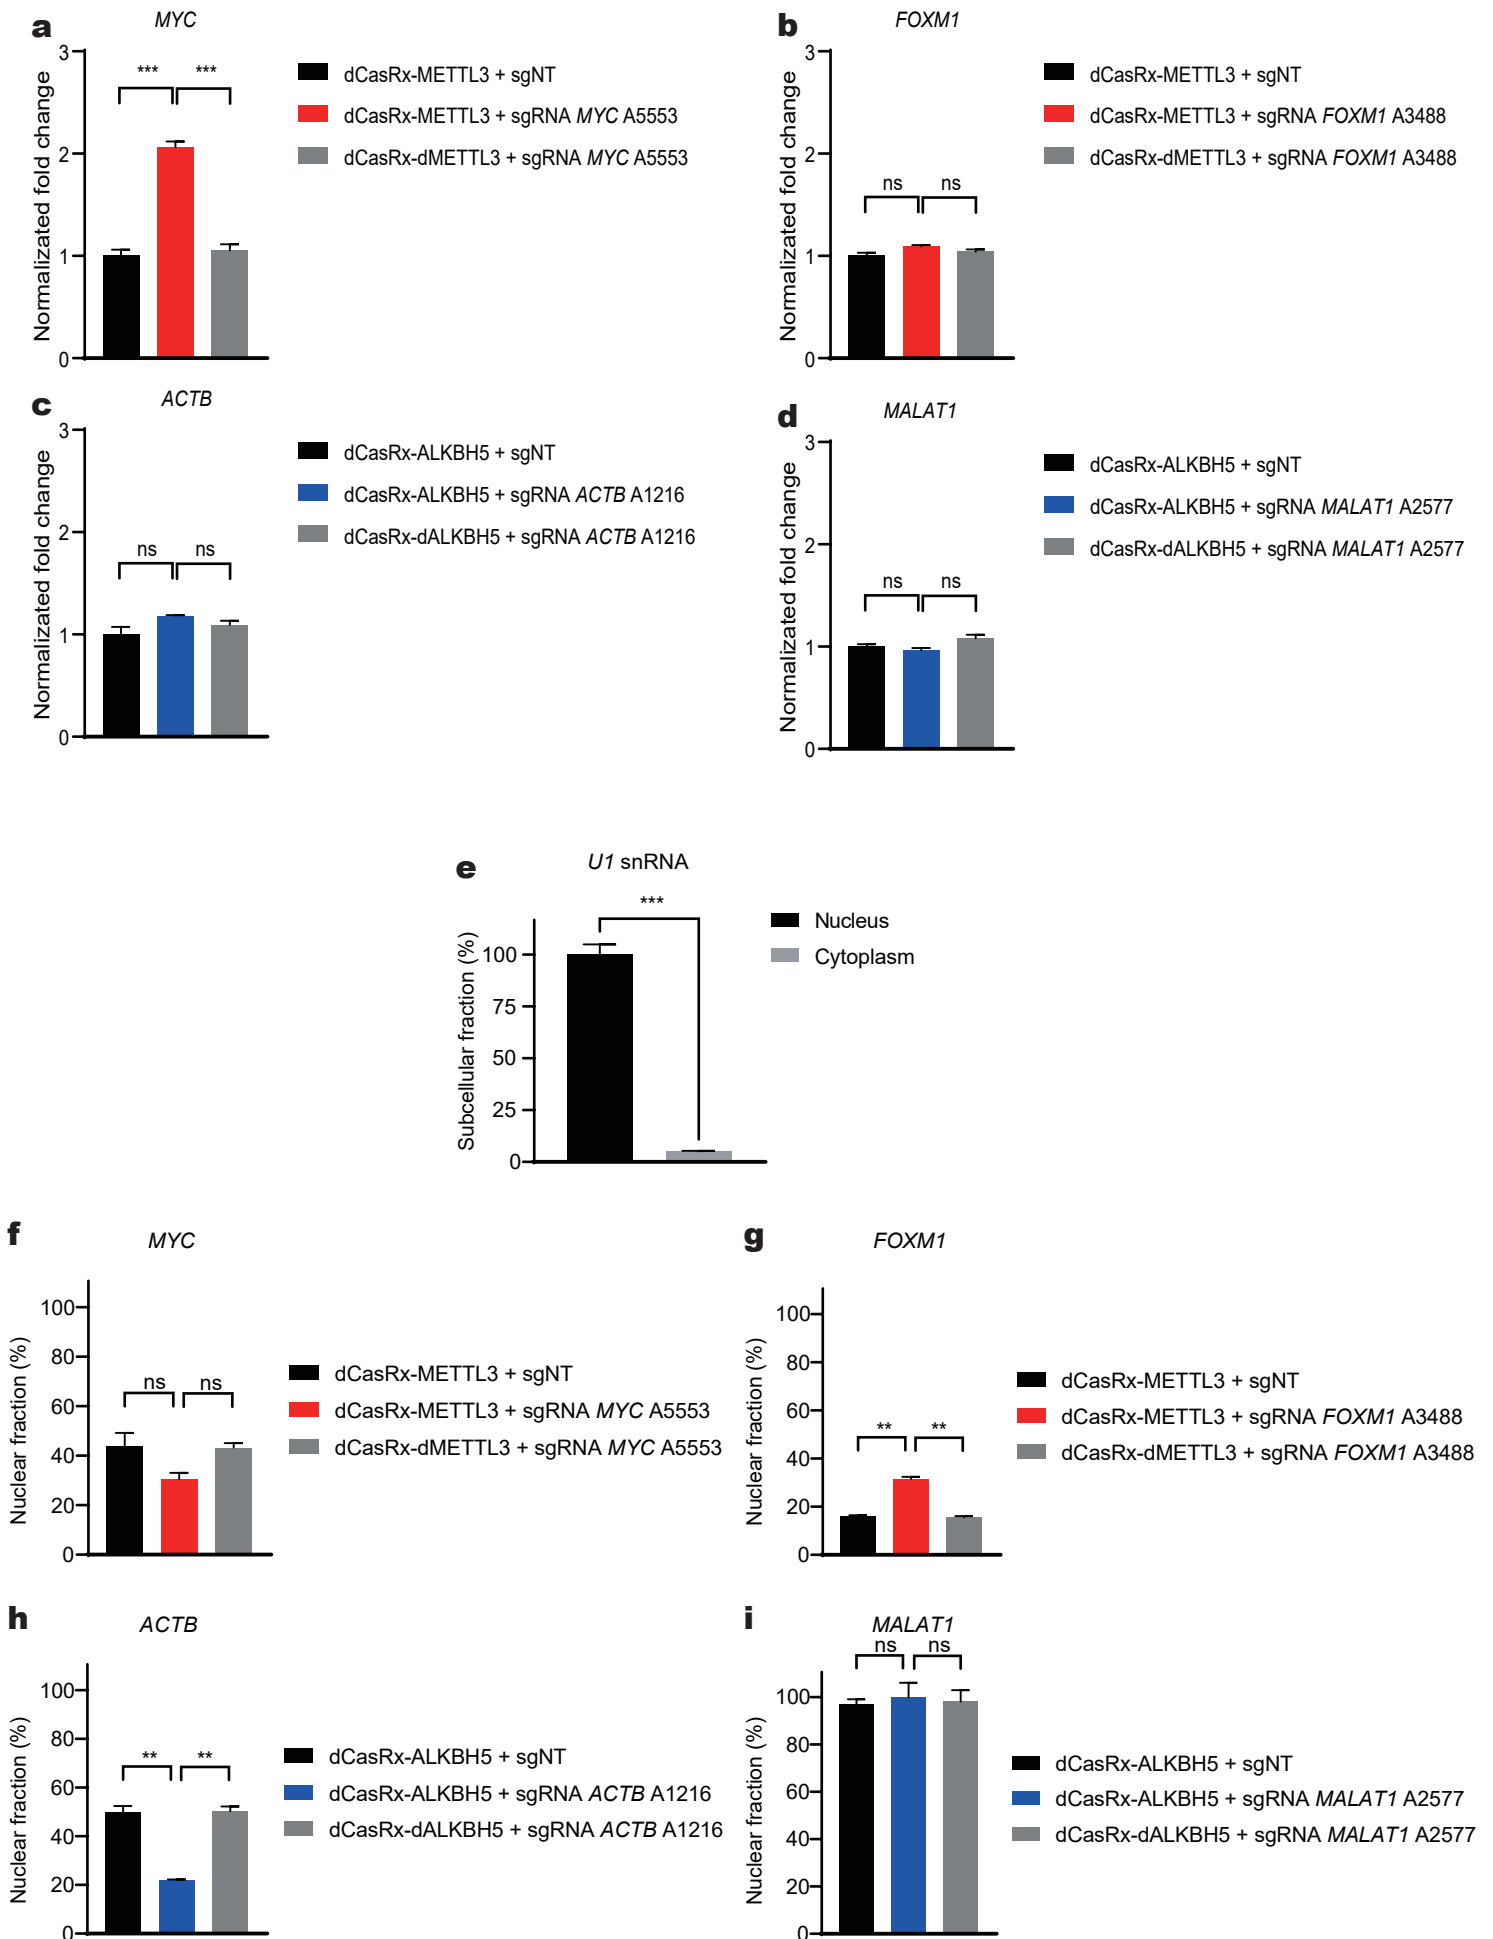

**Figure S2. The effect of changes in m6A level on transcripts altered splicing and nuclear export efficiency mediated by dCasRx epitranscriptome editors.**

**a-d**, qRT-PCR results of specific transcripts, *MYC* (**a**), *FOXM1* (**b**), *ACTB* (**c**) and *MALAT1* (**d**), were shown as fold change in the ratio of matured RNA to precursor RNA after manipulating m6A by dCasRx epitranscriptome editors. Data were calculated using a modified version of the  $2^{-\Delta\Delta CT}$  method to show changes in matured RNA, where CT was the threshold cycle. First, the CT values for the common amplicons were normalized to the levels of its corresponding precursor RNA, where  $\Delta CT = CT_{\text{matured RNA}} - CT_{\text{precursor RNA}}$ . Then, the fold changes were normalized to the sgNT group following with the equation  $\Delta\Delta CT = \Delta CT_{\text{target sgRNA or defunction enzyme}} - \Delta CT_{\text{sgNT}}$ . Normalized fold change =  $2^{-\Delta\Delta CT}$ . **e**, Distribution of *U1* snRNA transcripts in subcellular fractions assessed by qPCR. **f-i**, qRT-PCR results of specific transcripts, *MYC* (**f**), *FOXM1* (**g**), *ACTB* (**h**) and *MALAT1* (**i**), were shown as the percentage of target transcripts in the nucleus to it in whole cell after manipulating m6A by dCasRx epitranscriptome editors. Data are displayed as mean  $\pm$  SEM (ANOVA; ns: not significant; \*\*,  $P < 0.01$ , \*\*\*,  $P < 0.001$ ; n=3).

# Supplementary Figure S3

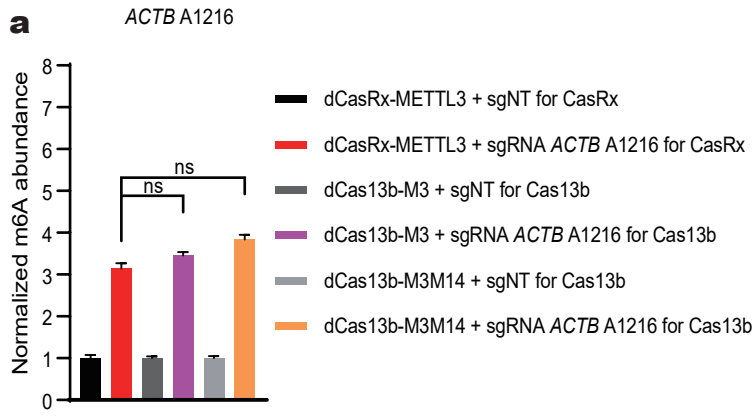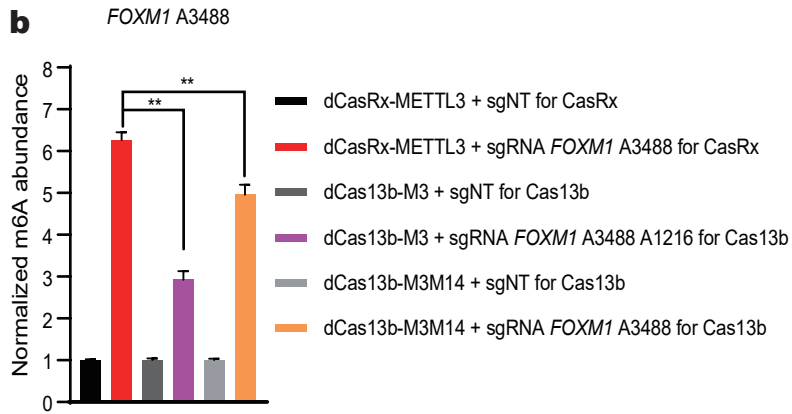

**Figure S3. Comparison of m6A editing efficiency between dCasRx-based system and dCas13b-based system. a-b,** Normalized abundance of m6A at *ACTB* A1216 (**a**) and *FOXO1* A3488 (**b**) detected by SELECT. It used same sgRNA sequences but different sgRNA scaffold to fit different system. Data are displayed as mean  $\pm$  SEM (ANOVA; ns: not significant; \*\*,  $P < 0.01$ ; n=3).

# Supplementary Figure S4

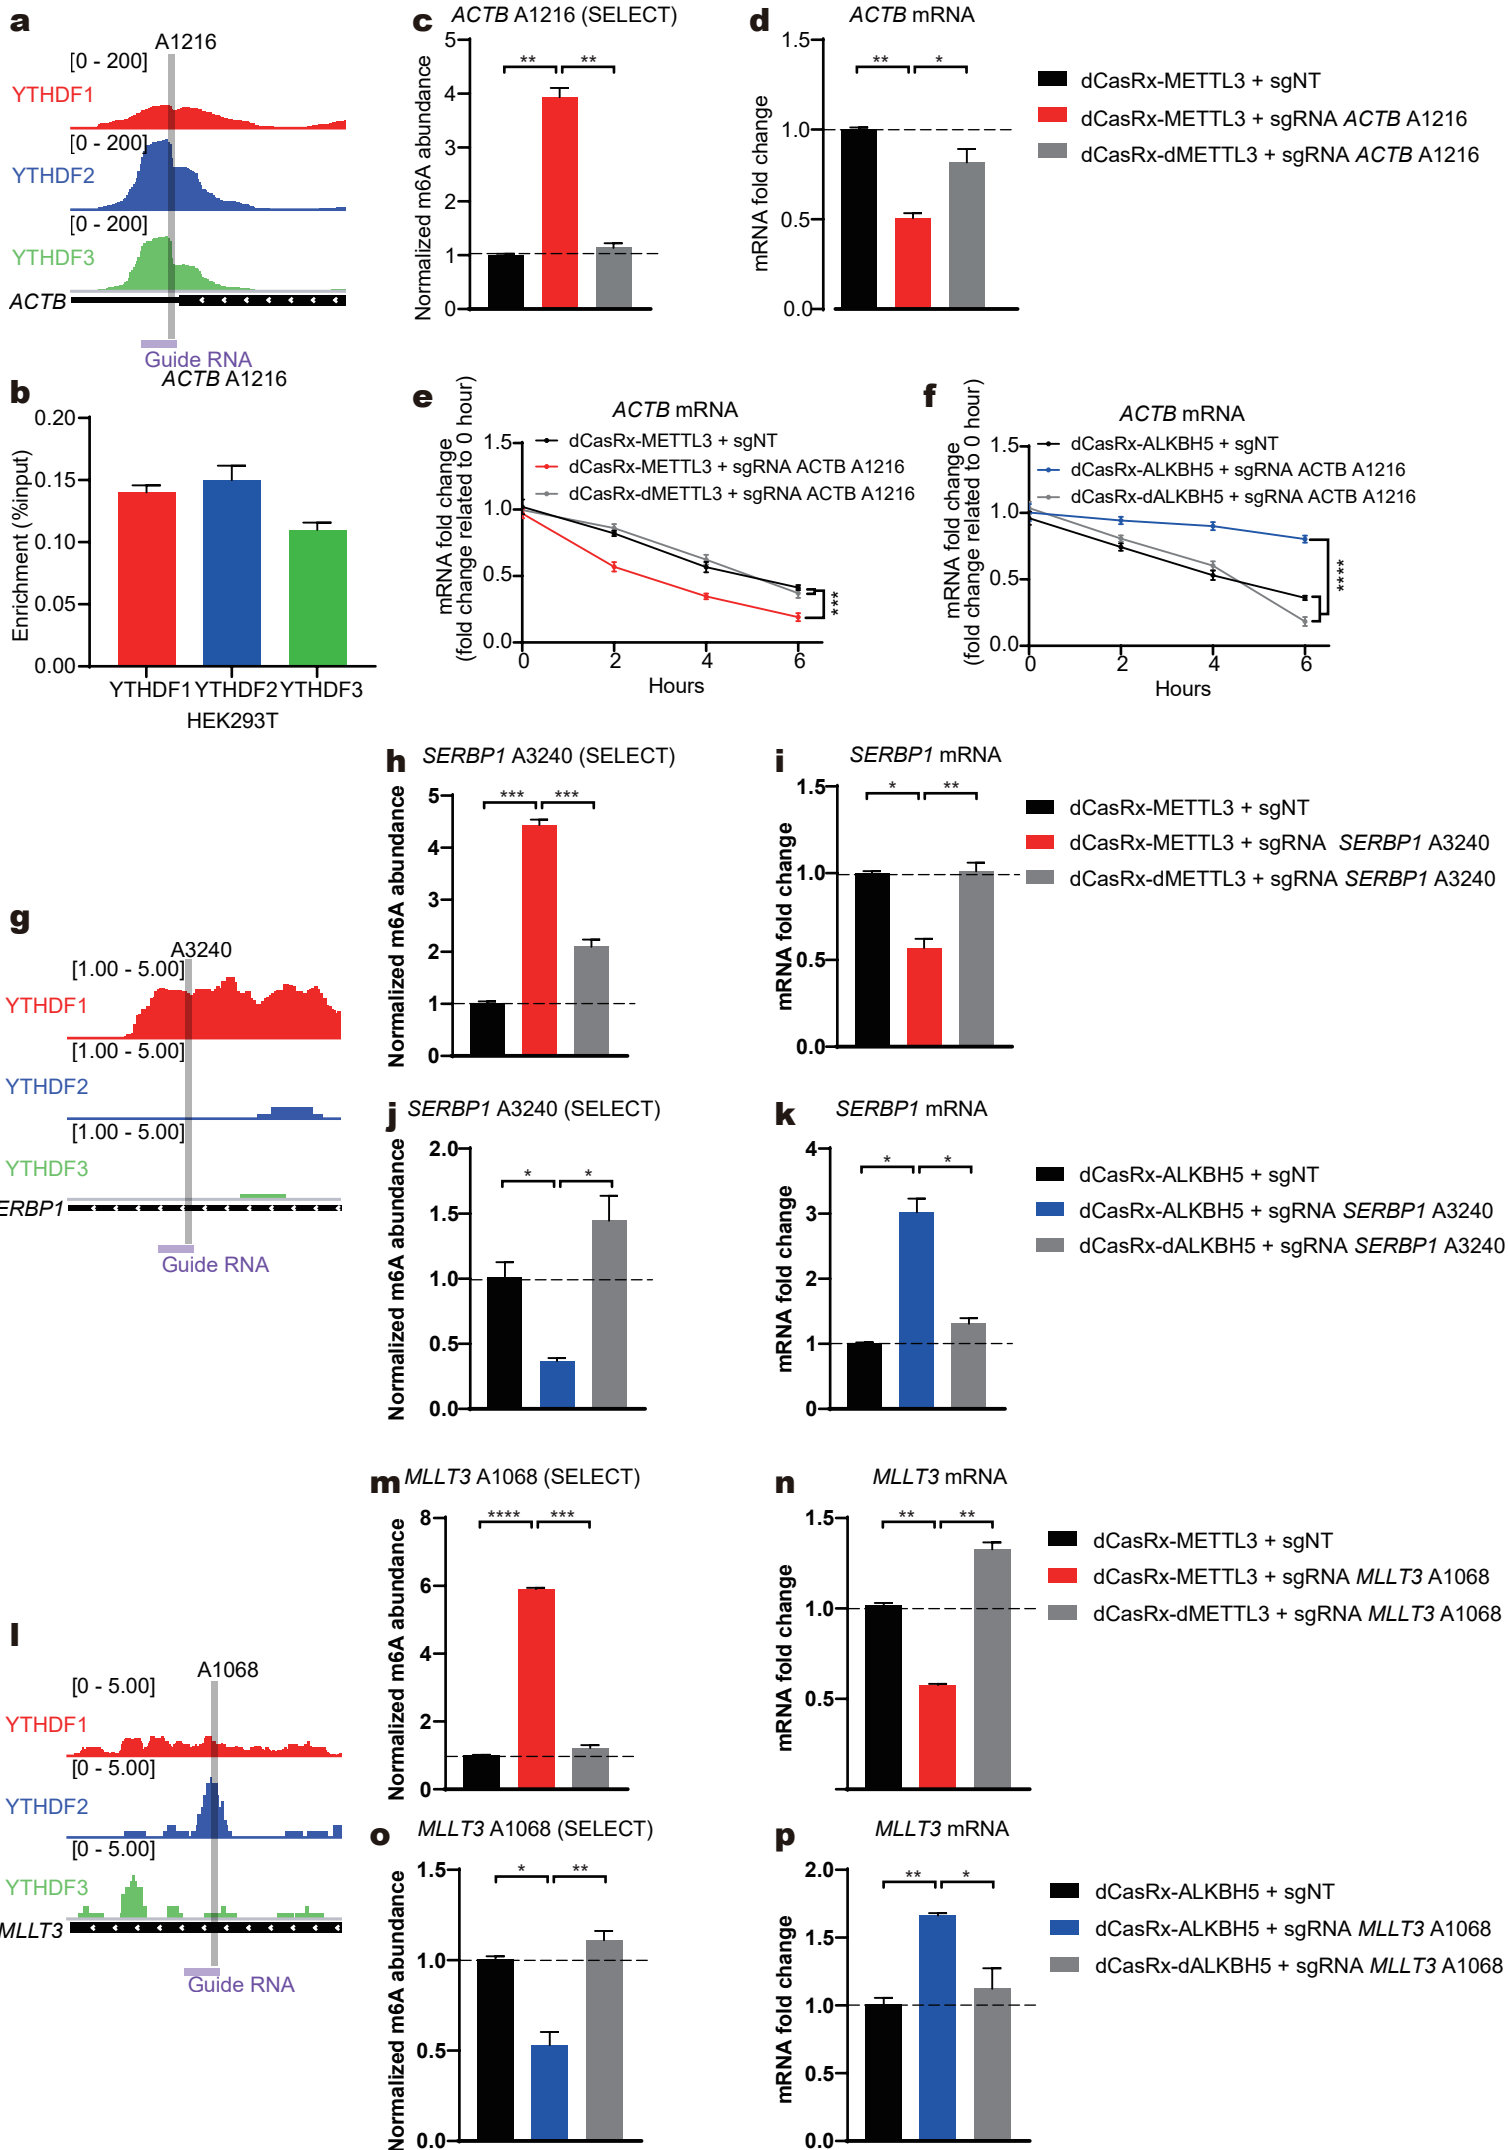



**Figure S4. m6A sites binding with DF paralogs control the degradation of endogenous transcripts in HEK293T cells.**

**a**, Schematic diagrams of distribution of DF paralogs, DF1 (red), DF2 (blue), and DF3 (green), in endogenous *ACTB* mRNA. Grey bars represent dCasRx-METTTL3 or dCasRx-ALKBH5 targeted sites. Purple bars represent sgRNA binding location. Distributions of DF paralogs was based on a database GSE78030 (11). **b**, The combination of YTHDF paralogs at *ACTB* A1216 in HEK293T cells, quantified by YTHDF paralog RIP coupled with RT-qPCR. **g, i**, Schematic diagrams of distribution of DF paralogs in endogenous *SERBP1* (**g**) and *MLLT3* (**i**) mRNA. **c, h, m**, Normalized abundance of altered m6A at *ACTB* A1216 (**c**), *SERBP1* A3240 (**h**), *MLLT3* A1068 (**m**) edited by dCasRx-METTTL3. **d, i, n**, Abundance of *ACTB* mRNA (**d**), *SERBP1* mRNA (**i**), *MLLT3* mRNA (**n**) decreased after dCasRx-METTTL3 editing. **e**, mRNA degradation measurement of *ACTB* in HEK293T cells edited with dCasRx-METTTL3. **f**, mRNA degradation measurement of *ACTB* in HEK293T cells edited with dCasRx-ALKBH5. **j, o**, Normalized abundance of altered m6A at *SERBP1* A3240 (**j**), *MLLT3* A1068 (**o**) edited by dCasRx-ALKBH5. **k, p**, Abundance of *SERBP1* mRNA (**k**), *MLLT3* mRNA (**p**) increased after dCasRx-ALKBH5 editing. Data is represented as mean  $\pm$  SEM. (ANOVA; \*, P value < 0.05; \*\*, P value < 0.01; \*\*\*, P value < 0.001; \*\*\*\*, P value < 0.0001; n = 3).

# Supplementary Figure S5

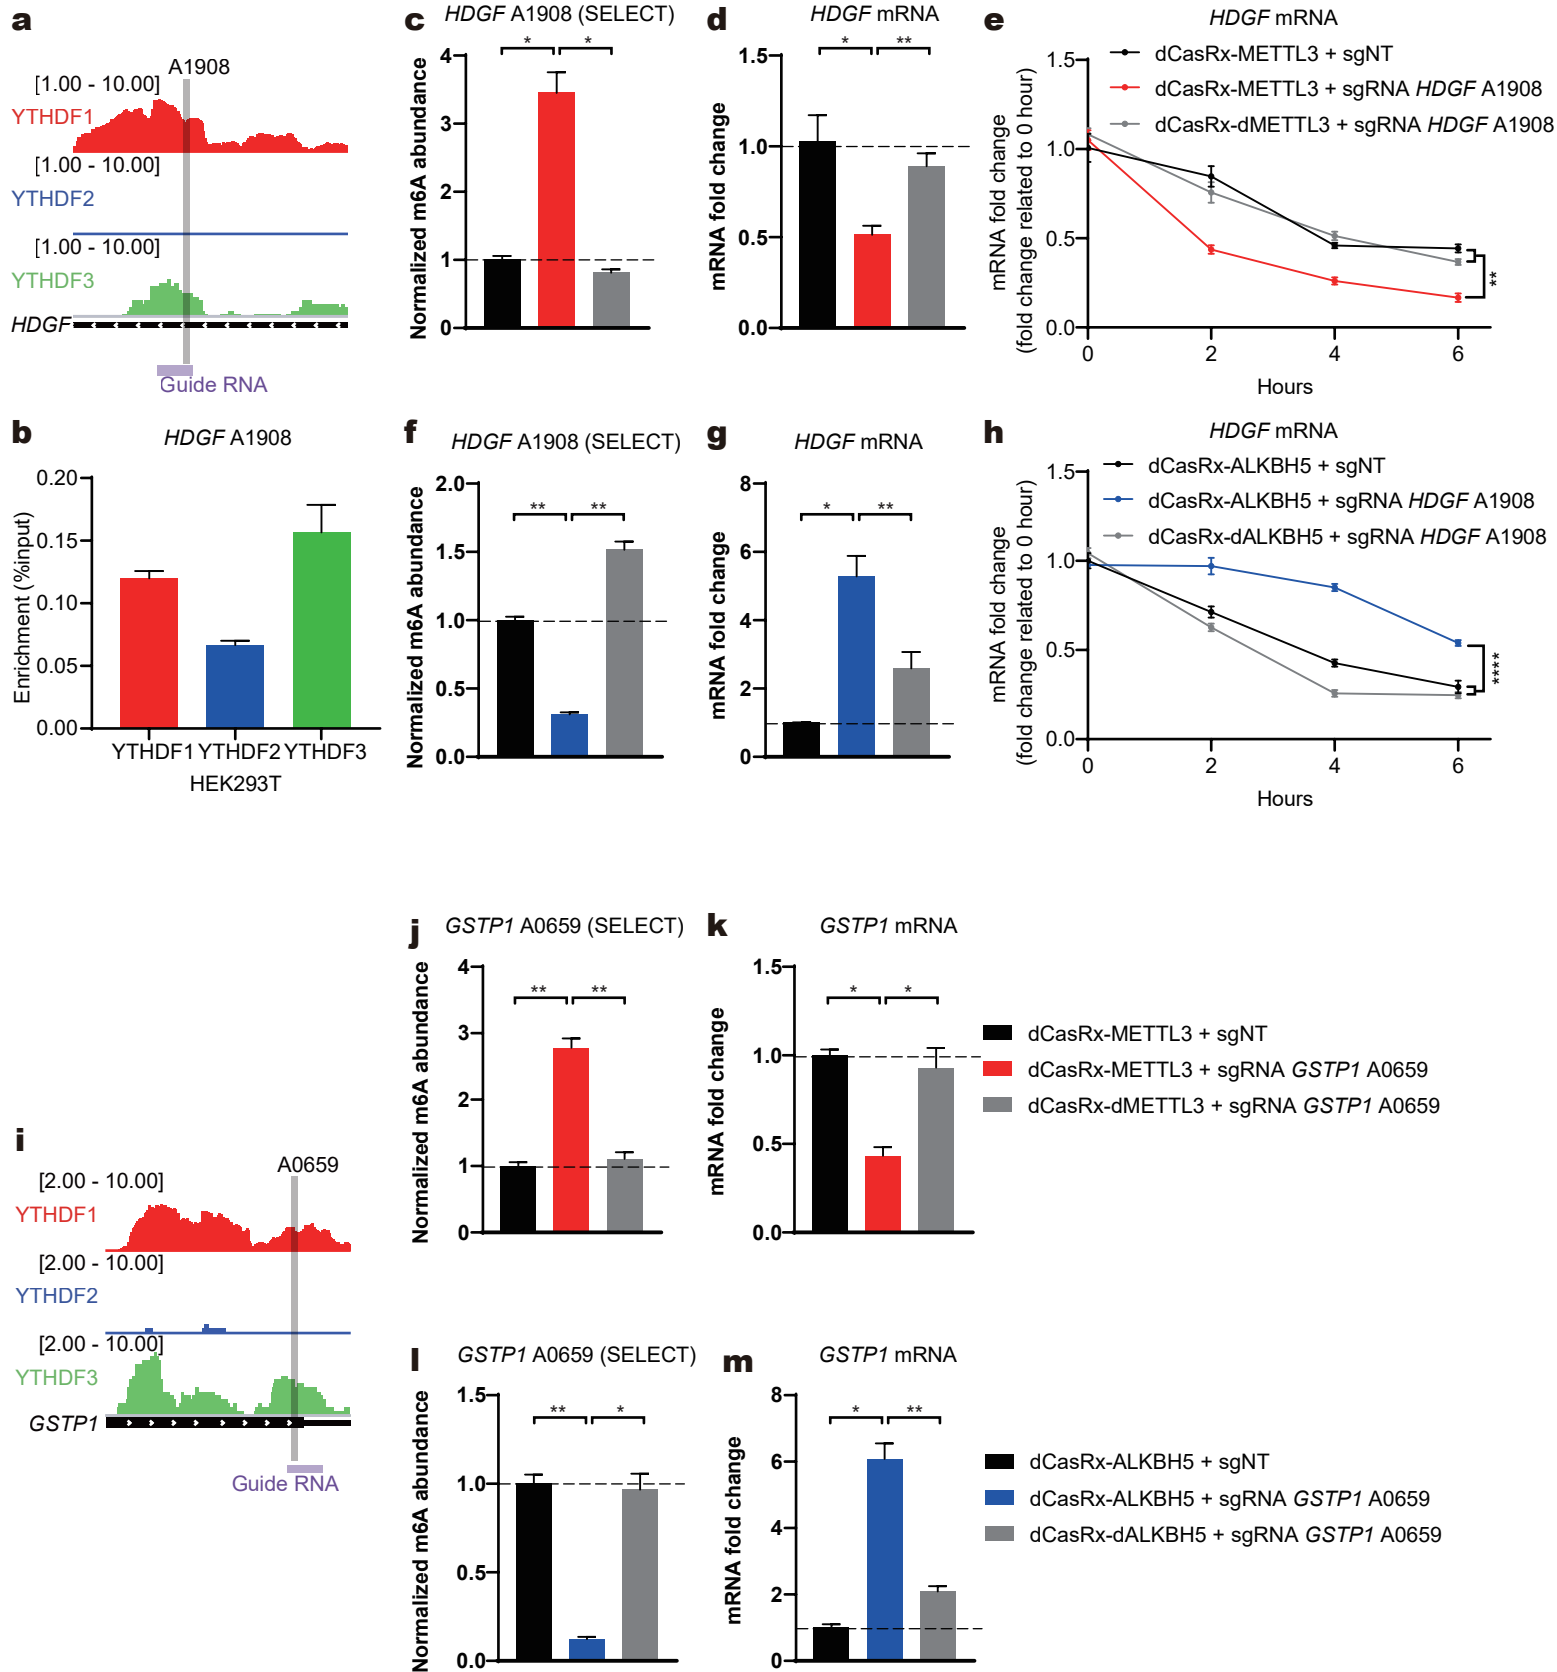

**Figure S5. m6A sites binding both DF1 and DF3 control the degradation of endogenous transcripts in HEK293T cell.**

**a,i**, Schematic diagrams of distribution of DF paralogs, DF1 (red), DF2 (blue), and DF3 (green), in endogenous *HDGF* (**a**) and *GSTP1* (**i**) mRNA. Grey bars represent dCasRx-METTTL3 or dCasRx-ALKBH5 targeted sites. Purple bars represent sgRNA binding location. Distributions of DF paralogs was based on a database GSE78030 (11). **b**, The combination of YTHDF paralogs at *HDGF* A1908 in HEK293T cells, quantified by YTHDF paralog RIP coupled with RT-qPCR. **c, j**, Normalized abundance of altered m6A at *HDGF* A1908 (**c**), *GSTP1* A0859 (**j**) edited by dCasRx-METTTL3. **d, k**, Abundance of *HDGF* mRNA (**d**), *GSTP1* mRNA (**k**) decreased after dCasRx-METTTL3 editing. **e**, mRNA degradation measurement of *HDGF* in HEK293T cells edited with dCasRx-METTTL3. **h**, mRNA degradation measurement of *HDGF* in HEK293T cells edited with dCasRx-ALKBH5. **f, l**, Normalized abundance of altered m6A at *HDGF* A1908 (**f**), *GSTP1* A0859 (**l**) edited by dCasRx-ALKBH5. **g, m**, Abundance of *HDGF* mRNA (**g**), *GSTP1* mRNA (**m**) increased after dCasRx-ALKBH5 editing. Data is represented as mean  $\pm$  SEM. (ANOVA, \*: P value < 0.05; \*\*: P value < 0.01; \*\*\*\*: P value < 0.0001. n = 3).

# Supplementary Figure S6

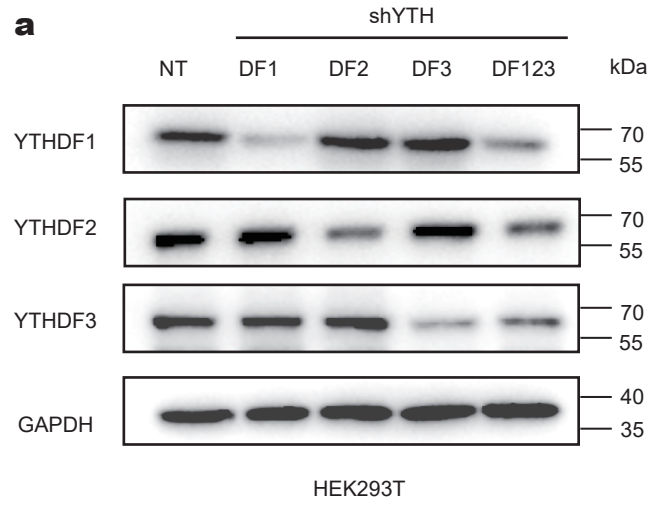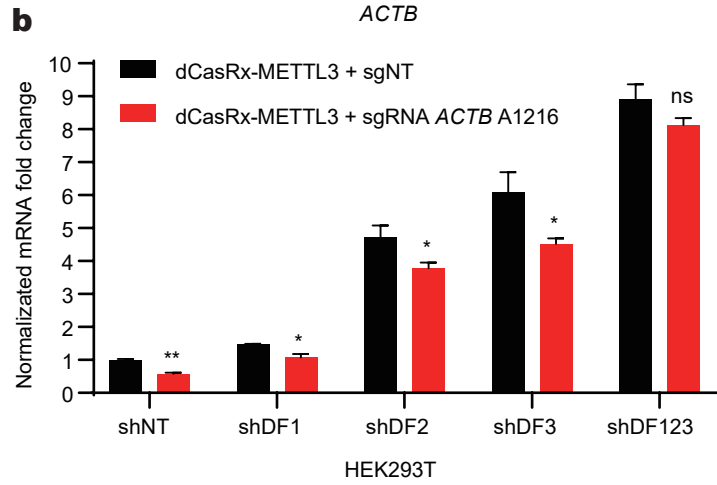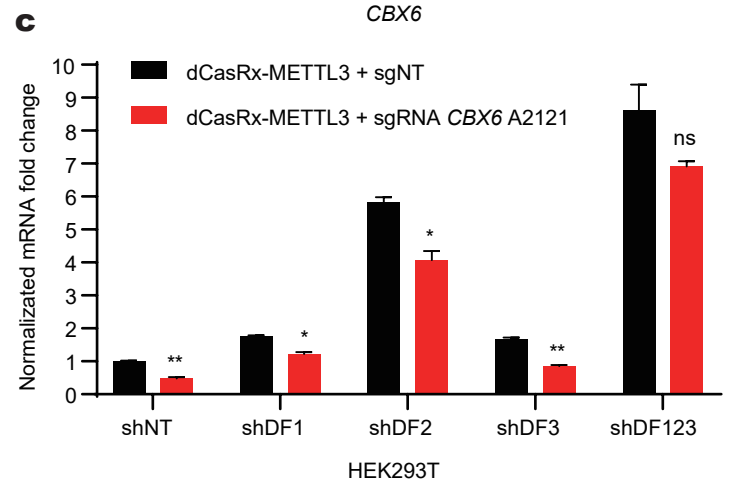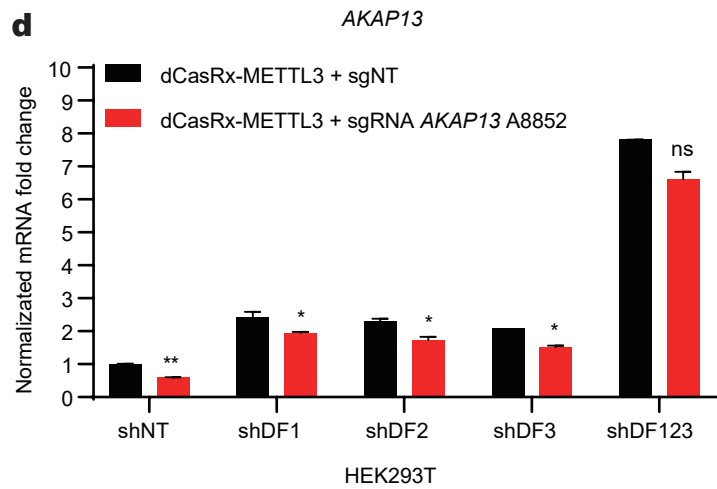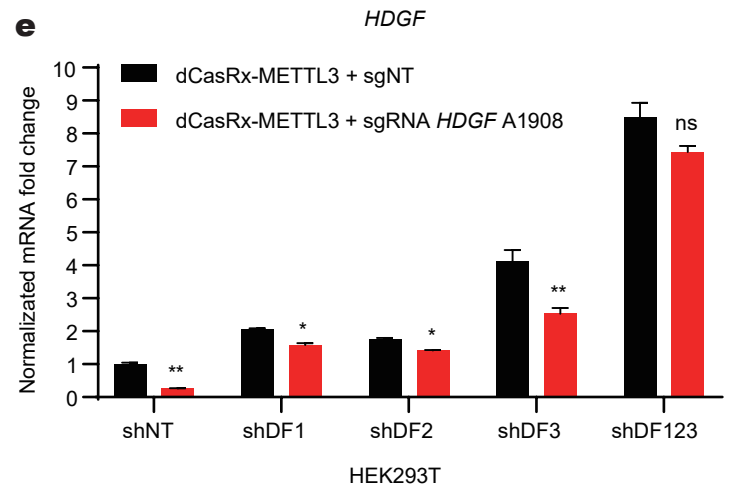

**Figure S6: Depletion of YTHDF Paralogs rescued the decrease of transcripts induced by upregulated m6A levels in HEK293T cells.**

**a**, Western blot results of knockdown YTHDF paralogs efficiency in living HEK293T cells. NT: non-target shRNA; DF1: shRNA targeted to YTHDF1; DF2: shRNA targeted to YTHDF2; DF3: shRNA targeted to YTHDF3; DF123: shRNAs targeted to YTHDF1/2/3. **b-e**, qRT-PCR results of select genes, *MYC* (**b**), *FOXM1* (**c**), *ACTB* (**d**) and *MALAT1* (**e**), shown as normalized mRNA fold change of sgNT and targeted group in HEK293T cells with depletion of different YTHDF paralogs. Data are displayed as mean  $\pm$  SEM (ANOVA; ns: not significant; \*,  $P < 0.05$ , \*\*,  $P < 0.01$ ;  $n=3$ ).

**Supplementary Table S1. dCasRx sgRNA sequences used in this study.**

| Name                         | Guide RNA spacer sequence        |
|------------------------------|----------------------------------|
| Non-targeting guide          | gCGTCTGGCCTTCCTGTAGCCAGCTTTCATC  |
| <i>MYC</i> A5553 guide       | gTTCATAGGTGATTGCTCAGGACATTTCTGT  |
| <i>FOXM1</i> A3488 guide     | gGTATGATTGGGGACATTATCAGAGAAACAT  |
| <i>MALAT1</i> A2577 guide    | gAAAATAATCTTAACTCAAAGTCCAATGCAA  |
| <i>ACTB</i> A1216 guide      | gGTAACGCAACTAAGTCATAGTCCGCCTAGA  |
| <i>SQLE</i> A0724 guide      | gGATCAGACCAGTTTTTAAAAATCATATAAA  |
| <i>CBX6</i> A2121 guide      | gCCTACTGAGGCGAGAGGCAGTCCAGGCCTT  |
| <i>SERBP1</i> A3240 guide    | gACTGAGAAGTTGTGTTTTGAGTAGCAGGTG  |
| <i>AKAP13</i> A8852 guide    | gGGGCAGTCACAAATCATGGCCGAAGCAGAG  |
| <i>MLLT3</i> A1068 guide     | gCGGCCTTTTACTAGGAGCCTTCTTATCTTG  |
| <i>HDGF</i> A1908 guide      | gGAAGGAGCAGAATGGAGAGCACACAAAGGG  |
| <i>GSTP1</i> A0659 guide     | gTCCCGCTCAGAGTCCCCCAACCCTCACTG   |
| <i>ACTB</i> A1216 guide -10  | gGCATTTGCGGTGGACGATGGAGGGGCCGGA  |
| <i>ACTB</i> A1216 guide -7   | gGAAGCATTGCGGTGGACGATGGAGGGGCC   |
| <i>ACTB</i> A1216 guide -4   | gCTAGAAGCATTGCGGTGGACGATGGAGGG   |
| <i>ACTB</i> A1216 guide -1   | gCGCCTAGAAGCATTGCGGTGGACGATGGA   |
| <i>ACTB</i> A1216 guide 0    | gGTAACGCAACTAAGTCATAGTCCGCCTAGA  |
| <i>ACTB</i> A1216 guide +1   | gAAGAAAGGGTGTAAACGCAACTAAGTCATAG |
| <i>ACTB</i> A1216 guide +4   | gGTCAAGAAAGGGTGTAAACGCAACTAAGTCA |
| <i>ACTB</i> A1216 guide +7   | gTTTGTCAAGAAAGGGTGTAAACGCAACTAAG |
| <i>ACTB</i> A1216 guide +10  | gGGTTTTGTCAAGAAAGGGTGTAAACGCAACT |
| <i>FOXM1</i> A3488 guide -10 | gATGATTGGGGACATTATCAGAGAAACATCT  |
| <i>FOXM1</i> A3488 guide -7  | gGGTATGATTGGGGACATTATCAGAGAAACA  |
| <i>FOXM1</i> A3488 guide -4  | gCCTGGTATGATTGGGGACATTATCAGAGAA  |
| <i>FOXM1</i> A3488 guide -1  | gCTCCCTGGTATGATTGGGGACATTATCAGA  |
| <i>FOXM1</i> A3488 guide 0   | gCCTGAGTTCTCGTCAATGCCAGTCTCCCTG  |
| <i>FOXM1</i> A3488 guide +1  | gAGCCTCCACCTGAGTTCTCGTCAATGCCAG  |
| <i>FOXM1</i> A3488 guide +4  | gTCAAGCCTCCACCTGAGTTCTCGTCAATGC  |
| <i>FOXM1</i> A3488 guide +7  | gTTCTCAAGCCTCCACCTGAGTTCTCGTCAA  |
| <i>FOXM1</i> A3488 guide +10 | gGCCTTCTCAAGCCTCCACCTGAGTTCTCGT  |

**Supplementary Table S2. dCas13b sgRNA sequences used in this study.**

| <b>Name</b>              | <b>Guide RNA spacer sequence</b> |
|--------------------------|----------------------------------|
| Non-targeting guide      | gGTAATGCCTGGCTTGTGACGCATAGTCTG   |
| <i>ACTB</i> A1216 guide  | gGAAGCATTGCGGTGGACGATGGAGGGGCC   |
| <i>FOXM1</i> A3488 guide | gGTATGATTGGGGACATTATCAGAGAAACAT  |

**Supplementary Table S3. RT-qPCR sequences used in this study.**

| Name                       | Sequence                |
|----------------------------|-------------------------|
| 18S forward                | GGCCCTGTAATTGGAATGAGTC  |
| 18S reverse                | CCAAGATCCAACACTACGAGCTT |
| <i>MYC</i> forward         | GGCTCCTGGCAAAGGTCA      |
| <i>MYC</i> reverse         | CTGCGTAGTTGTGCTGATGT    |
| <i>FOXM1</i> forward       | CGTCGGCCACTGATTCTCAA    |
| <i>FOXM1</i> reverse       | GGCAGGGGATCTCTTAGGTTT   |
| <i>MALAT1</i> forward      | GACGGAGGTTGAGATGAAGCT   |
| <i>MALAT1</i> reverse      | ATTCGGGGCTCTGTAGTCCT    |
| <i>ACTB</i> forward        | CATGTACGTTGCTATCCAGGC   |
| <i>ACTB</i> reverse        | CTCCTTAATGTCACGCACGAT   |
| <i>SQLE</i> forward        | GGCATTGCCACTTTACCTAT    |
| <i>SQLE</i> reverse        | GGCCTGAGAGAATATCCGAGAAG |
| <i>CBX6</i> forward        | ACCCAAACCCAAAACCTTTCCT  |
| <i>CBX6</i> reverse        | GTCTCCGAGAAGGGCGAAAT    |
| <i>SERBP1</i> forward      | CCTGGGCACTTACAGGAAGG    |
| <i>SERBP1</i> reverse      | GGTCCGATTTCGTCGCAAATAAC |
| <i>AKAP13</i> forward      | GTCAACGGGCACACTTTCAG    |
| <i>AKAP13</i> reverse      | GGAGGCTAGACTTTCTCGGC    |
| <i>MLLT3</i> forward       | TTTGTGGAGAAAGTCGTCTTCC  |
| <i>MLLT3</i> reverse       | GAGGTGATTCACTGGTGGATG   |
| <i>HDGF</i> forward        | CTCTCCCTTACGAGGAATCCA   |
| <i>HDGF</i> reverse        | CCTTGACAGTAGGGTTGTTCTC  |
| <i>GSTP1</i> forward       | CCCTACACCGTGGTCTATTTCC  |
| <i>GSTP1</i> reverse       | CAGGAGGCTTTGAGTGAGC     |
| <i>U1snRNA</i> forward     | CCATGATCACGAAGGTGGTTT   |
| <i>U1snRNA</i> reverse     | ATGCAGTCGAGTTTCCACAT    |
| pre- <i>MYC</i> forward    | GCTTCTCAGAGGCTTGCGG     |
| pre- <i>MYC</i> reverse    | CTGGAATTACTACAGCGAGTT   |
| pre- <i>FOXM1</i> forward  | CGTTGGTTCACCTTATCTCT    |
| pre- <i>FOXM1</i> reverse  | AACCCTTCTCCAAACAGGAG    |
| pre- <i>ACTB</i> forward   | CAGGTGGCTGTGGGGTCTCT    |
| pre- <i>ACTB</i> reverse   | CGCTCAGGAGGAGCAATGAT    |
| pre- <i>MALAT1</i> forward | GCATTCAAGTTCCATAAGCTG   |
| pre- <i>MALAT1</i> reverse | ATTCGATCACCTTCCGCCGC    |



**Supplementary Table S4. SELECT primer sequences used in this study.**

| Name                     | Sequence                                                  |
|--------------------------|-----------------------------------------------------------|
| qPCR-F for SELECT        | ATGCAGCGACTCAGCCTCTG                                      |
| qPCR-R for SELECT        | TAGCCAGTACCGTAGTGCGTG                                     |
| Control A UP             | <b>tagccagtaccgtagtgcgtg</b> ATAGGTGATTGCTCAGGACA         |
| Control A UP             | <b>5phos/TTCTGTTAGAAGGAATCGTTcagaggctgagtcgctgcat</b>     |
| MYC A5553 target UP      | <b>tagccagtaccgtagtgcgtg</b> GATTGCTCAGGACATTTCTG         |
| MYC A5553 target DOWN    | <b>5phos/TAGAAGGAATCGTTTTCCCTTcagaggctgagtcgctgcat</b>    |
| FOXM1 A3488 target UP    | <b>tagccagtaccgtagtgcgtg</b> TGAGTTCTCGTCAATGCCAG         |
| FOXM1 A3488 target DOWN  | <b>5phos/CTCCCTGGTATGATTGGGGAcagaggctgagtcgctgcat</b>     |
| MALAT1 A2577 target UP   | <b>tagccagtaccgtagtgcgtg</b> GGATTTAAAAAATAATCTTAACTCAAAG |
| MALAT1 A2577 target DOWN | <b>5phos/CCAATGCAAAAACATTAAGTcagaggctgagtcgctgcat</b>     |
| ACTB A1216 target UP     | <b>tagccagtaccgtagtgcgtg</b> GTAACGCAACTAAGTCATAG         |
| ACTB A1216 target DOWN   | <b>5phos/CCGCCTAGAAGCATTTCGCGGcagaggctgagtcgctgcat</b>    |
| SQLE A0724 target UP     | <b>tagccagtaccgtagtgcgtg</b> CAGACCAGTTTTTAAAAATCATATAAAG |
| SQLE A0724 target DOWN   | <b>5phos/TAGTGTAAGATATGTGAAGCCcagaggctgagtcgctgcat</b>    |
| CBX6 A2121 target UP     | <b>tagccagtaccgtagtgcgtg</b> CCTACTGAGGCGAGAGGCAG         |
| CBX6 A2121 target DOWN   | <b>5phos/CCAGGCCTTCAATGCCCTGcagaggctgagtcgctgcat</b>      |
| SERBP1 A3240 target UP   | <b>tagccagtaccgtagtgcgtg</b> TGTGTTTTGAGTAGCAGGTG         |
| SERBP1 A3240 target DOWN | <b>5phos/TTTCTATAGTATGTTGCTGGcagaggctgagtcgctgcat</b>     |
| AKAP13 A8852 target UP   | <b>tagccagtaccgtagtgcgtg</b> AAATCATGGCCGAAGCAGAG         |
| AKAP13 A8852 target DOWN | <b>5phos/CTGGGCCTCCTTCCCCACCCcagaggctgagtcgctgcat</b>     |
| MLLT3 A1068 target UP    | <b>tagccagtaccgtagtgcgtg</b> CTAGGAGCCTTCTTATCTTG         |
| MLLT3 A1068 target DOWN  | <b>5phos/CCACTGGTGATGGTGAGTAAcagaggctgagtcgctgcat</b>     |
| HDGF A1908 target UP     | <b>tagccagtaccgtagtgcgtg</b> AATGGAGAGCACACAAAGGG         |
| HDGF A1908 target DOWN   | <b>5phos/TAGGGGTCTTTAAAATTTTTcagaggctgagtcgctgcat</b>     |
| GSTP1 A0659 target UP    | <b>tagccagtaccgtagtgcgtg</b> AGTCCCCCAACCCTCACTG          |
| GSTP1 A0659 target DOWN  | <b>5phos/TTCCCGTTGCCATTGATGGGcagaggctgagtcgctgcat</b>     |

**Supplementary Table S5. Primers used for m6A-RIP assay in this study.**

| <b>Name</b>                        | <b>Sequence</b>          |
|------------------------------------|--------------------------|
| <i>MYC</i> A5553 target forward    | AGGAAAAGTAAGGAAAACGATTCC |
| <i>MYC</i> A5553 target reverse    | TGATCATGCATTTGAAACAAGTTC |
| <i>FOXM1</i> A3488 target forward  | TGCCCAGATGTGCGCTATTA     |
| <i>FOXM1</i> A3488 target reverse  | CTTCTCAAGCCTCCACCTGA     |
| <i>MALAT1</i> A2577 target forward | CGTAACGGAAGTAATTCAAG     |
| <i>MALAT1</i> A2577 target reverse | GTCAATTAATGCTAGTCCTC     |
| <i>ACTB</i> A1216 target forward   | ATCGTCCACCGCAAATGCTT     |
| <i>ACTB</i> A1216 target reverse   | TCATCTTGTTTTCTGCGCAAGT   |

**Supplementary Table S6. Primers used for YTHDF-RIP assay in this study.**

| <b>Name</b>                        | <b>Sequence</b>        |
|------------------------------------|------------------------|
| <i>ACTB</i> A1216 target forward   | ATCGTCCACCGCAAATGCTT   |
| <i>ACTB</i> A1216 target reverse   | TCATCTTGTTTTCTGCGCAAGT |
| <i>SQLE</i> A0724 target forward   | TACAACCTGGCTTCACATAC   |
| <i>SQLE</i> A0724 target reverse   | GTAAACAGTGTCCCAGGACG   |
| <i>CBX6</i> A2121 target forward   | CAGTTCCTTTGAACAGGGGC   |
| <i>CBX6</i> A2121 target reverse   | CACAGCAAACCTCCAGACCC   |
| <i>AKAP13</i> A8852 target forward | ATATTGAGTGTCGGGTGGGG   |
| <i>AKAP13</i> A8852 target reverse | TGAGTAGGGCCAGCCCAACC   |
| <i>HDGF</i> A1908 target forward   | AAAAAAAAATTTTAAAGACC   |
| <i>HDGF</i> A1908 target reverse   | CCCAGTGCACCTCAGAAATG   |

**Supplementary Table S7. shRNA sequences used in this study.**

| <b>Name</b>         | <b>Sequence</b>       |
|---------------------|-----------------------|
| Non-targeting shRNA | CAACAAGATGAAGAGCACCAA |
| shRNA YTHDF1        | ACAGACAGTGTGATGGATGAT |
| shRNA YTHDF2        | TACTGATTAAGTCAGGATTAA |
| shRNA YTHDF3        | TAAGTCAAAGAAGACGTATTA |
